# Supplementary material for: Liquid-infused nitric oxide-releasing (LINORel) silicone for decreased fouling, thrombosis, and infection of medical devices
Source: PubMed Central journal article supplement (PMC5648791; doi:10.1038/s41598-017-14012-9), 2017-10-19
Supplement: 41598_2017_14012_MOESM1_ESM.pdf [file 41598_2017_14012_MOESM1_ESM.pdf]

**Liquid-infused nitric oxide-releasing (LINORel) silicone for decreased fouling, thrombosis, and infection of medical devices**

Marcus J. Goudie<sup>a</sup>, Jitendra Pant<sup>a</sup>, Hitesh Handa<sup>\*a</sup>

<sup>a</sup>School of Chemical, Materials and Biomedical Engineering, College of Engineering, University of Georgia, Athens, GA, USA

Supplementary Information

\*Corresponding Author:

Hitesh Handa  
University of Georgia  
220 Riverbend Road  
Athens, GA 30602  
Telephone: (706) 542-8109  
E-mail: [hhanda@uga.edu](mailto:hhanda@uga.edu)

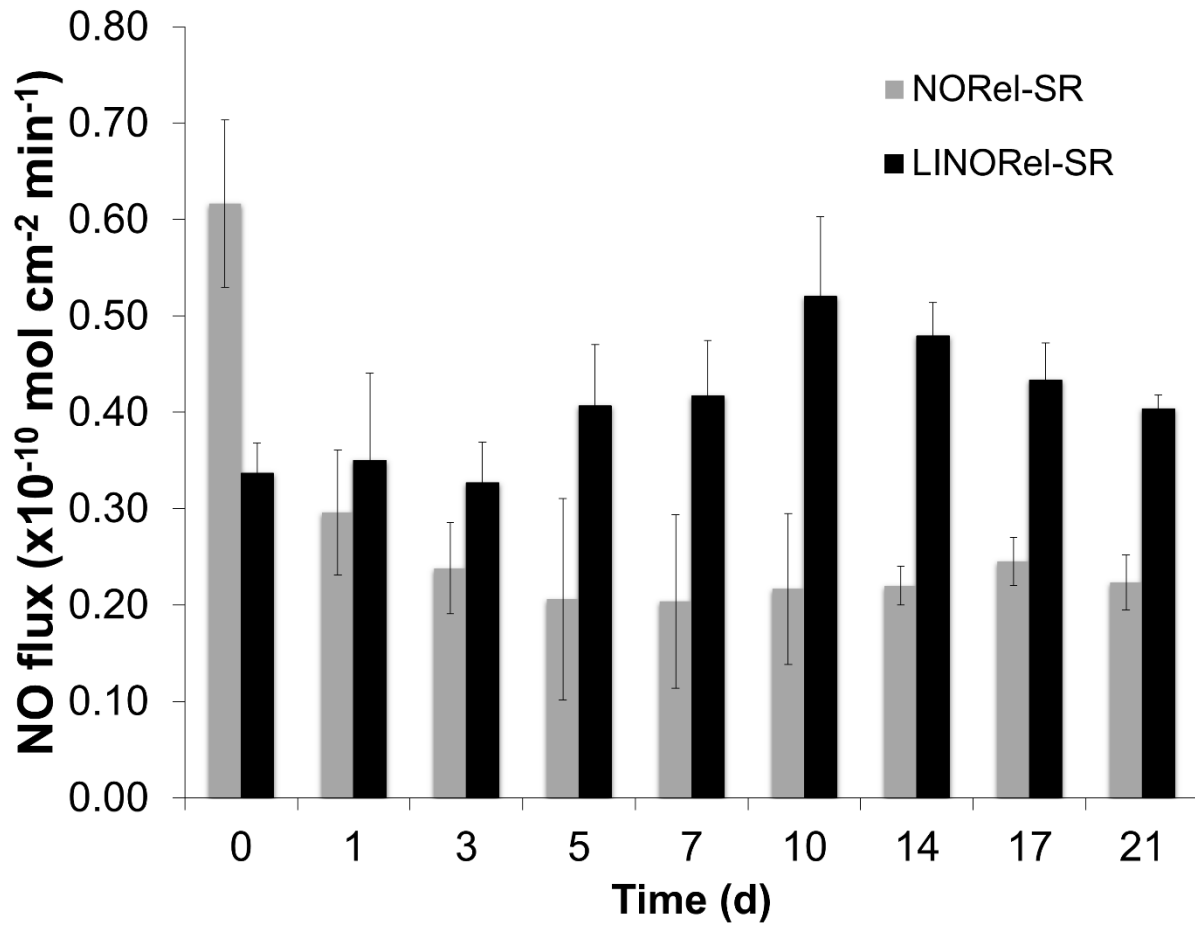

Figure S1: Extended nitric oxide release from LI-SR and LINORel-SR measured via chemiluminescence over a 21 d period.
